# Supplementary material for: Serendipitous N , S -difunctionalization of triazoles with trifluoromethyl-β-diketones: access to regioisomeric 1-trifluoroacetyl-3-aryl-5-(2-oxo-2-arylethylthio)-1,2,4-triazoles as DNA-groove binders
Source: Royal Society of Chemistry journal article supplement (doi:10.1039/d4ra00083h), 2024-01-01

**Serendipitous *N,S*-Difunctionalization of Triazoles with Trifluoromethyl- $\beta$ -diketones:  
Access to Regioisomeric 1-Trifluoroacetyl-3-aryl-5-(2-oxo-2-arylethylthio)-1,2,4-  
triazoles as DNA-Groove Binders**

Ranjana Aggarwal,<sup>a,b\*</sup> Prince Kumar,<sup>a</sup> Mona Hooda,<sup>c</sup> Suresh Kumar,<sup>a</sup>

<sup>a</sup>Department of Chemistry, Kurukshetra University, Kurukshetra-136119, Haryana, India

<sup>b</sup>Council of Scientific and Industrial Research-National Institute of Science Communication and Policy Research, New Delhi 110012, India.

<sup>c</sup>Department of Chemistry, Gurugram University, Gurugram-122003, Haryana, India.

\*Corresponding author:

Prof. Ranjana Aggarwal, CSIR-National Institute of Science Communication and Policy  
Research, New Delhi, India. Tel: +91-9896740740

E-mails: [ranjana67in@yahoo.com](mailto:ranjana67in@yahoo.com), [ranjanaaggarwal67@gmail.com](mailto:ranjanaaggarwal67@gmail.com)

# SUPPLEMENTARY DATA

## 1-Trifluoroacetyl-3-(4-tolyl)-5-((2-oxo-2-phenylethyl)thio)-1,2,4-triazole 14a

### <sup>1</sup>H of 14a

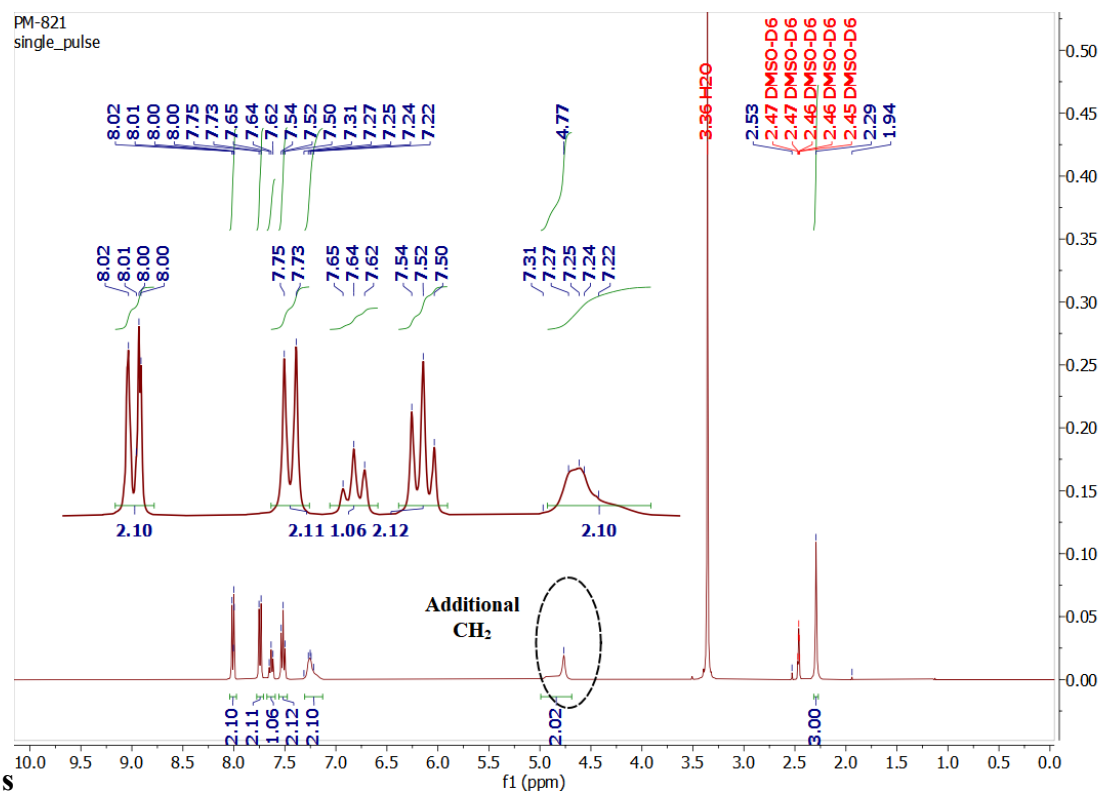

### <sup>13</sup>C of 14a

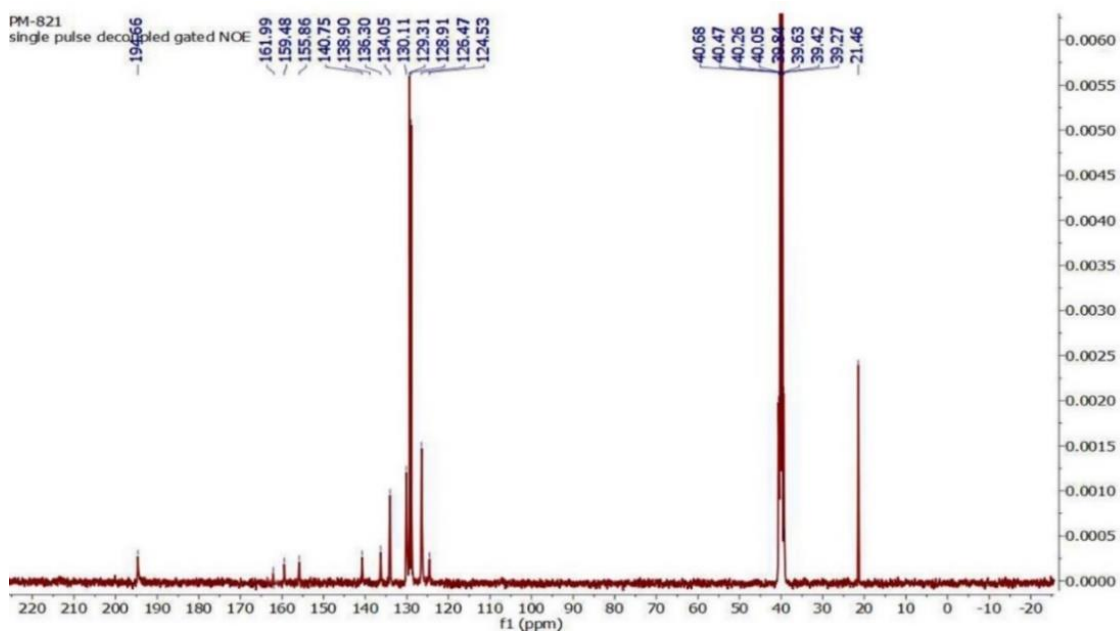

# $^{19}\text{F}$ of **14a**

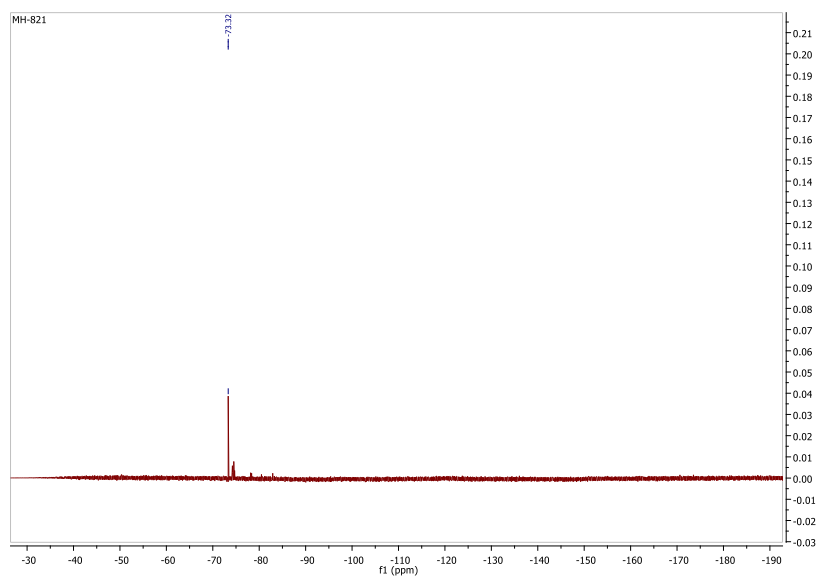

# DEPT spectrum of **14a**

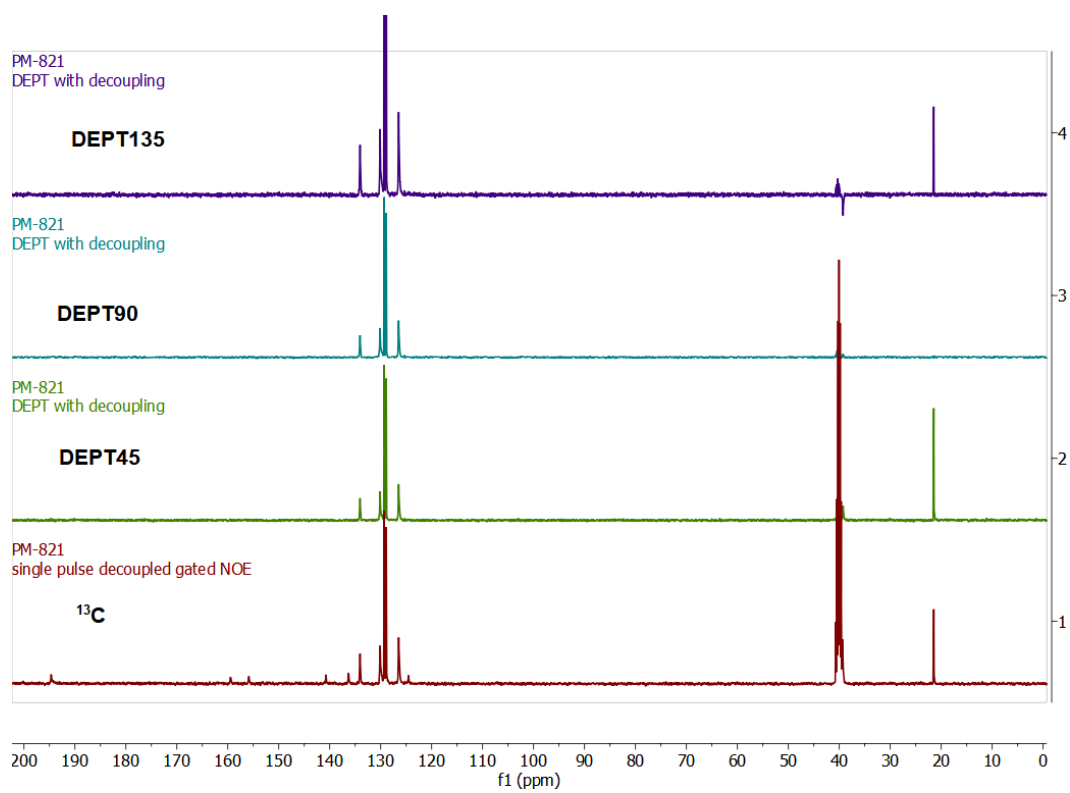

# HRMS spectrum of compound 14a

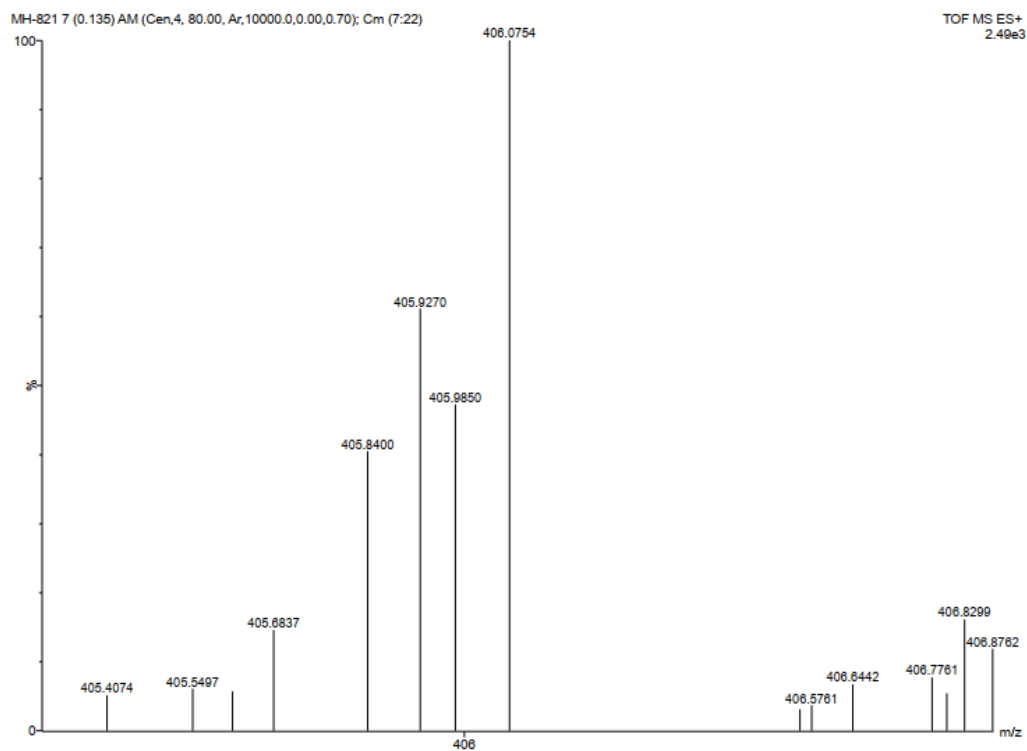

# (<sup>1</sup>H-<sup>13</sup>C) HSQC spectrum of compound 14a

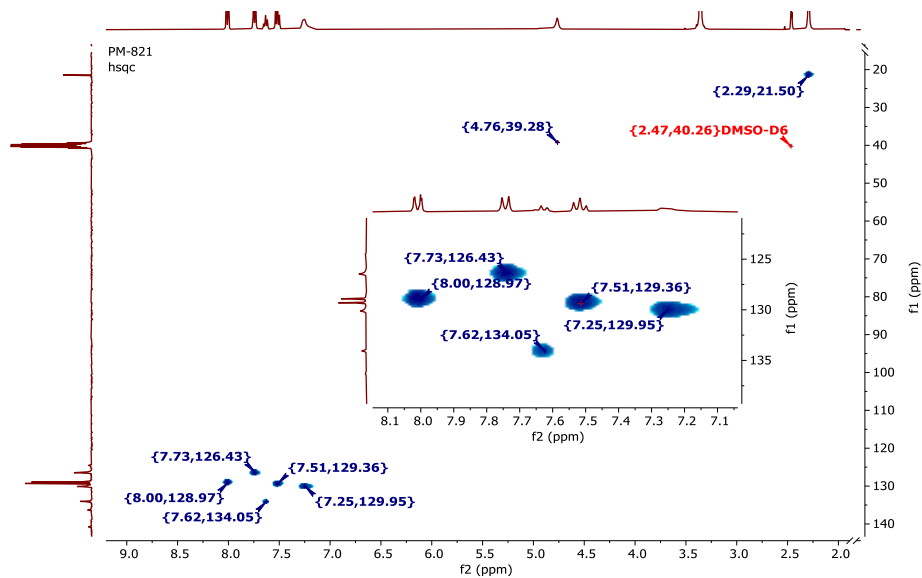

$(^1\text{H}-^{13}\text{C})$  HMBC spectrum of compound **14a**

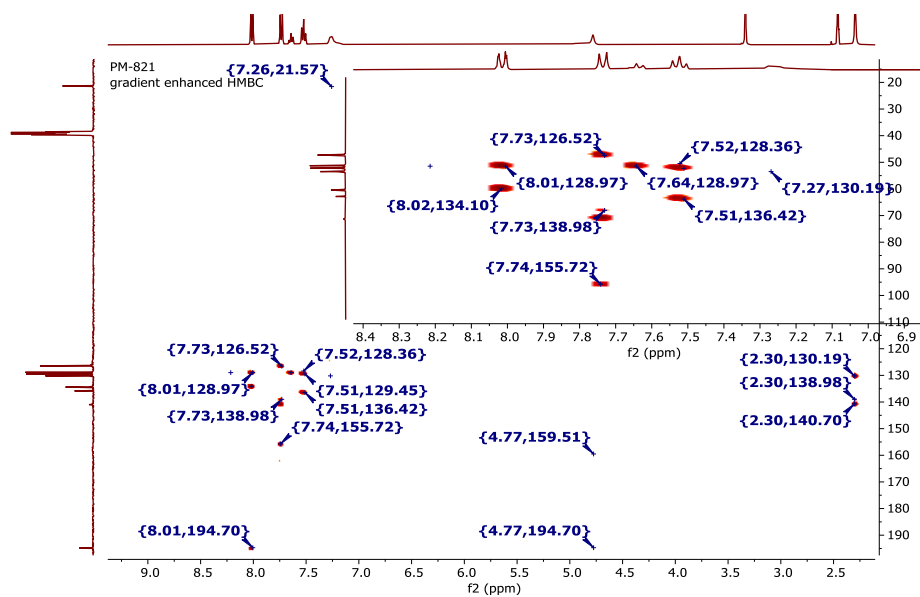

$(^{19}\text{F}-^{13}\text{C})$  HMBC spectrum of compound **14a**

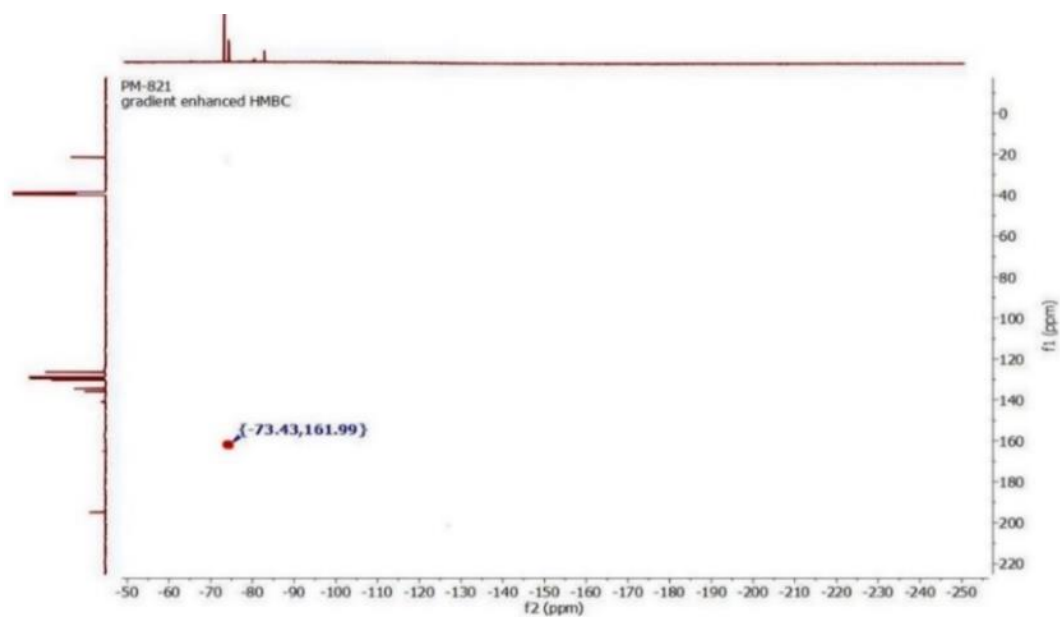

# 1-Trifluoroacetyl-3-(4-tolyl)-5-((2-oxo-2-(4-fluorophenyl)ethyl)thio)-1,2,4-triazole 14b

## <sup>1</sup>H of 14b

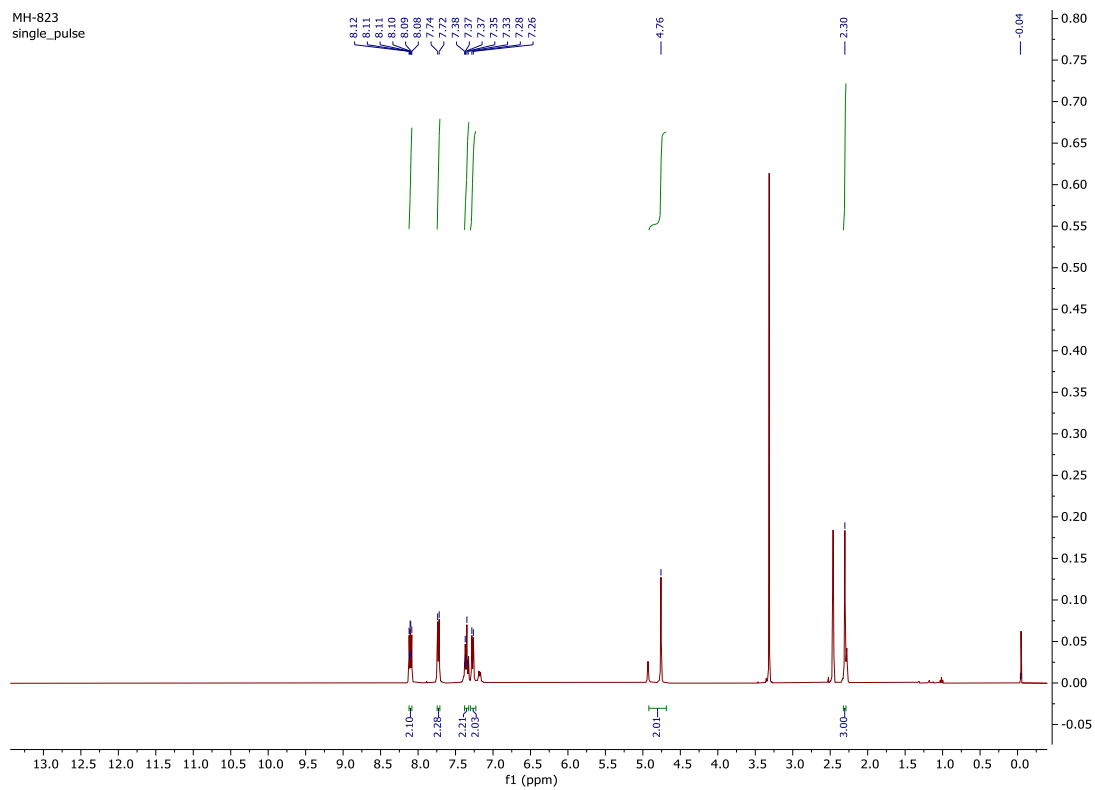

## <sup>13</sup>C of 14b

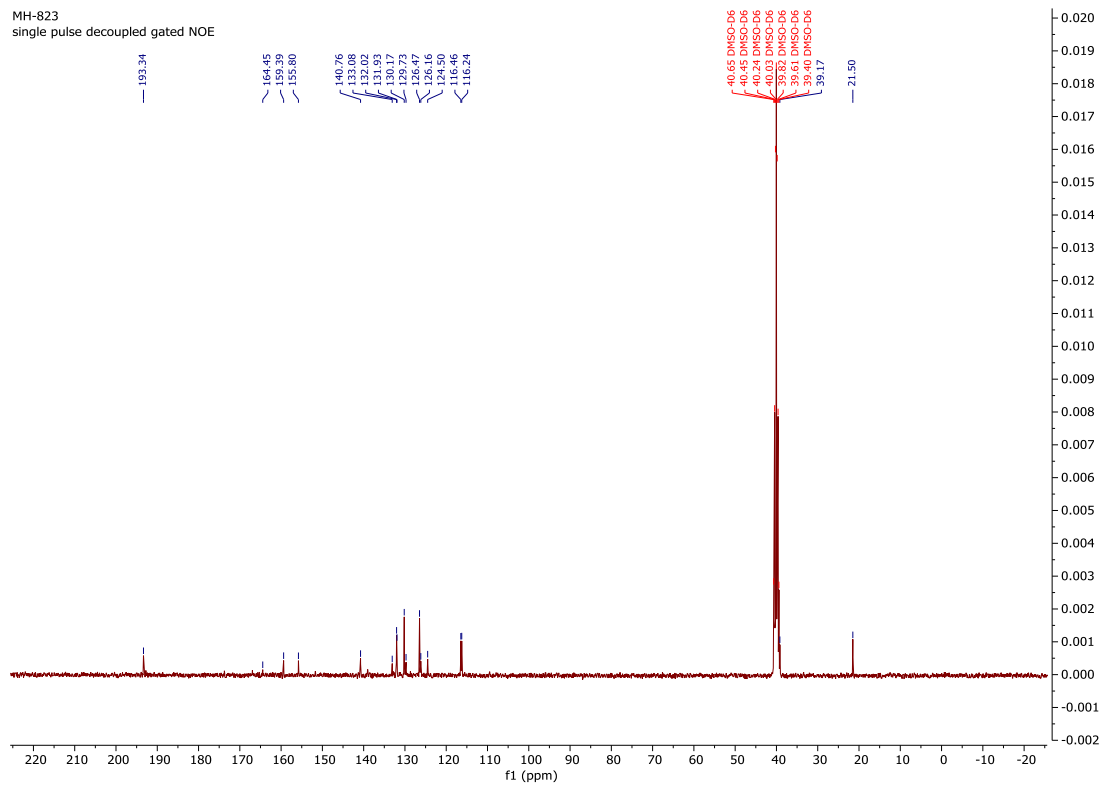

# 1-Trifluoroacetyl-3-(4-tolyl)-5-((2-oxo-2-(4-chlorophenyl)ethyl)thio)-1,2,4-triazole 14c

## <sup>1</sup>H of 14c

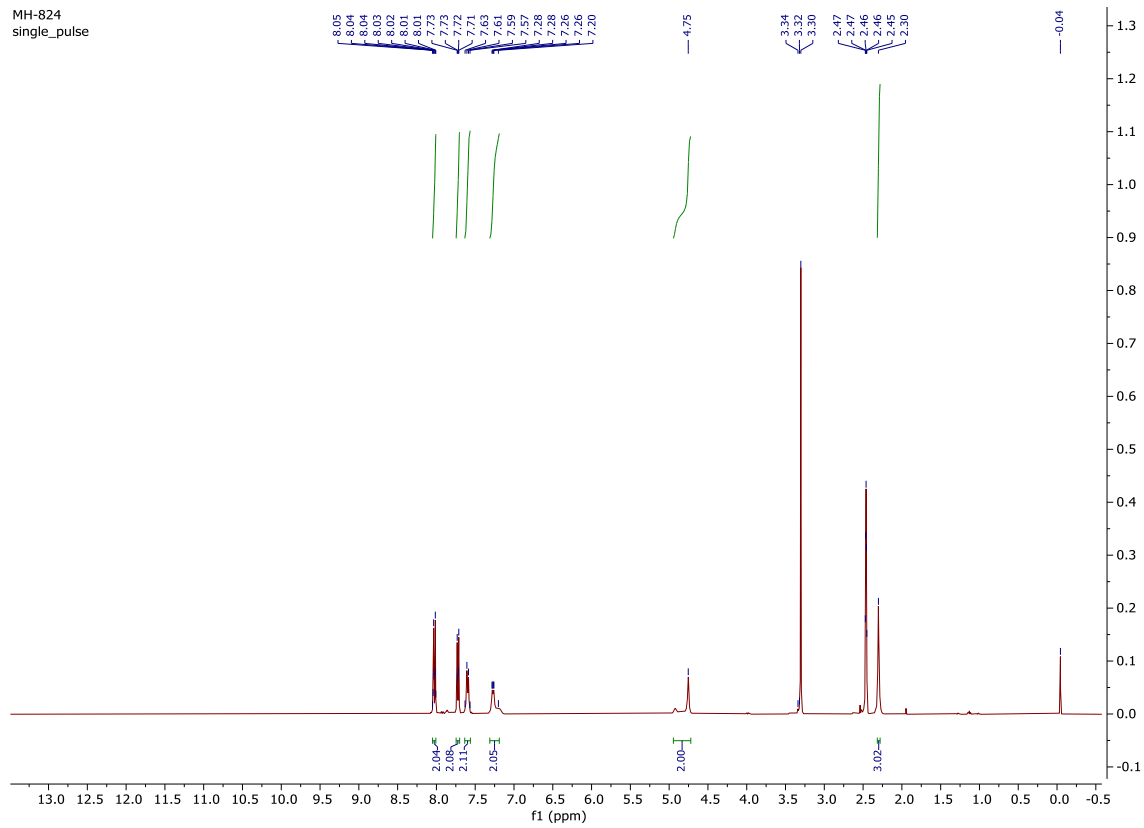

## <sup>13</sup>C of 14c

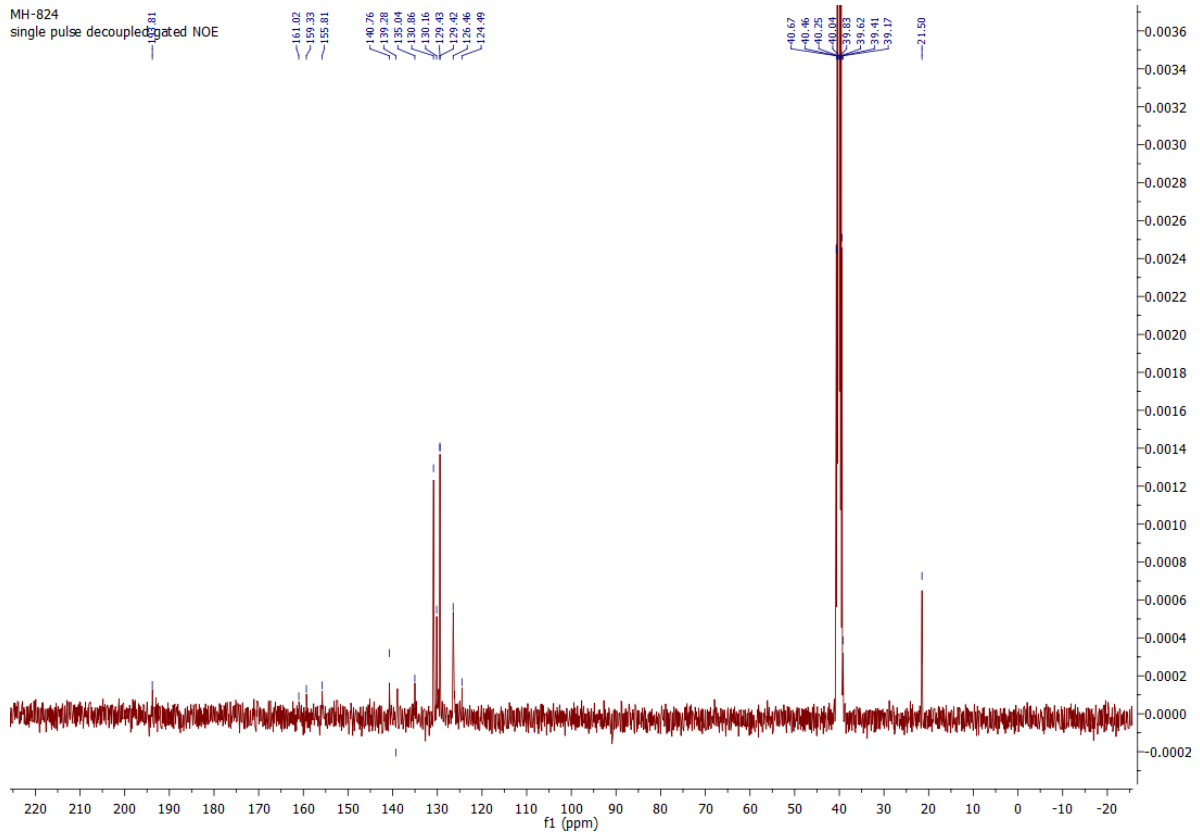

# 1-Trifluoroacetyl-3-(4-tolyl)-5-((2-oxo-2-(thienyl)ethyl)thio)-1,2,4-triazole 14d

## <sup>1</sup>H of 14d

PM-826  
single\_pulse

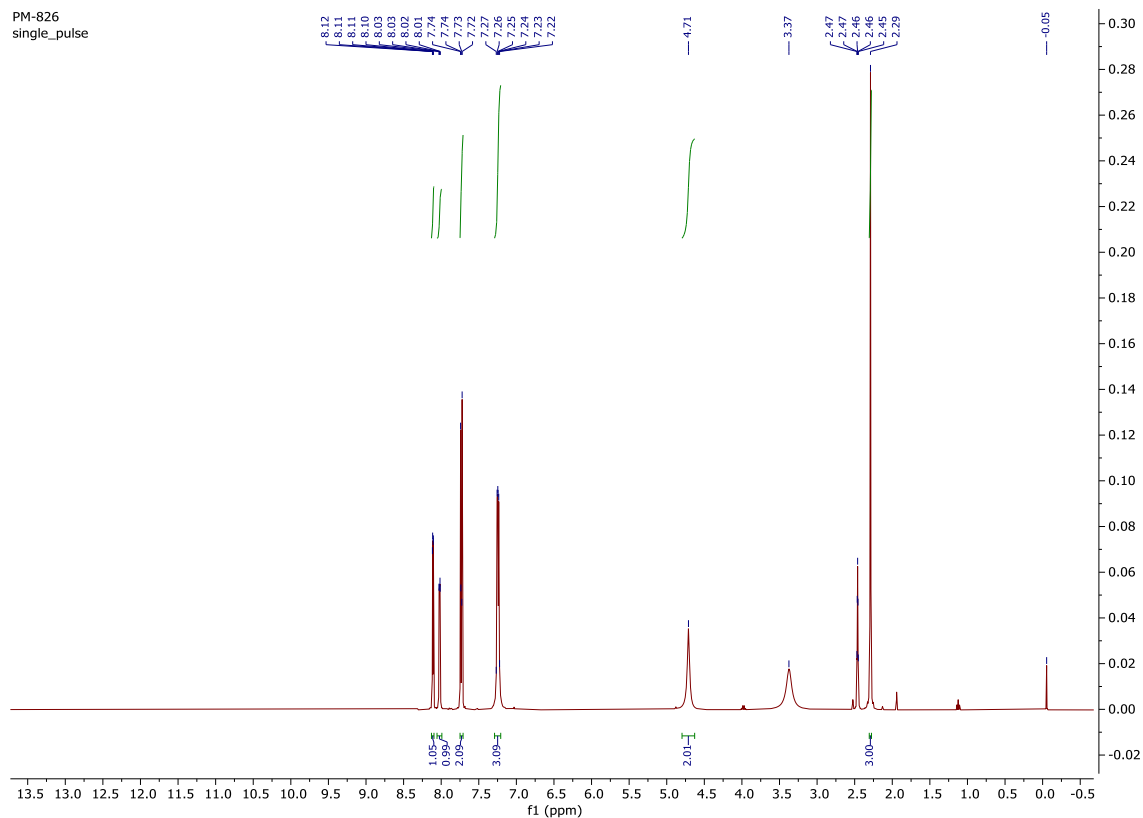

## <sup>13</sup>C of 14d

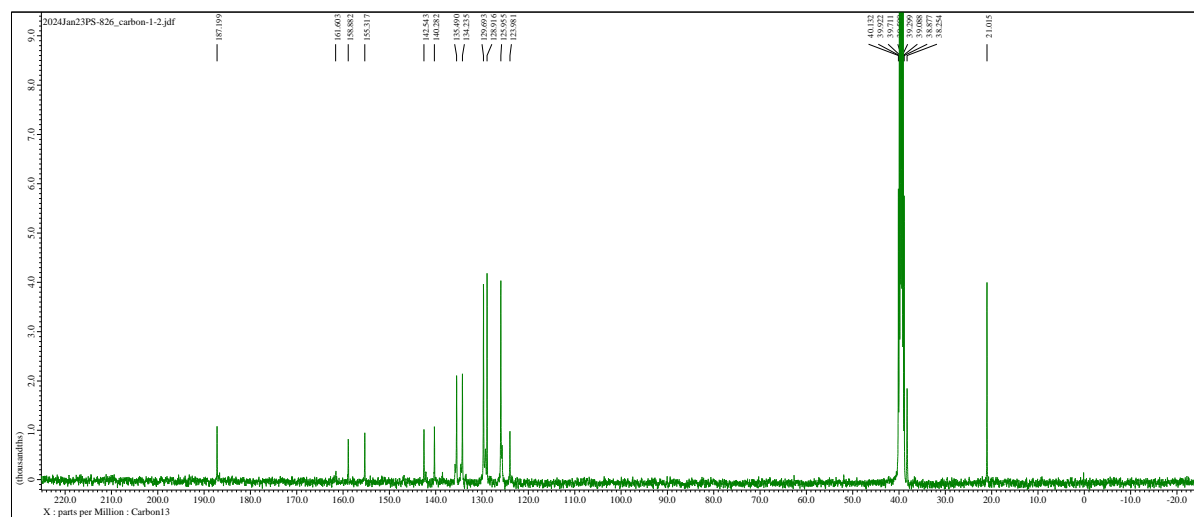



# 1-Trifluoroacetyl-3-phenyl)-5-((2-oxo-2-(4-fluorophenyl)ethyl)thio)-1,2,4-triazole 14e

## <sup>1</sup>H of 14e

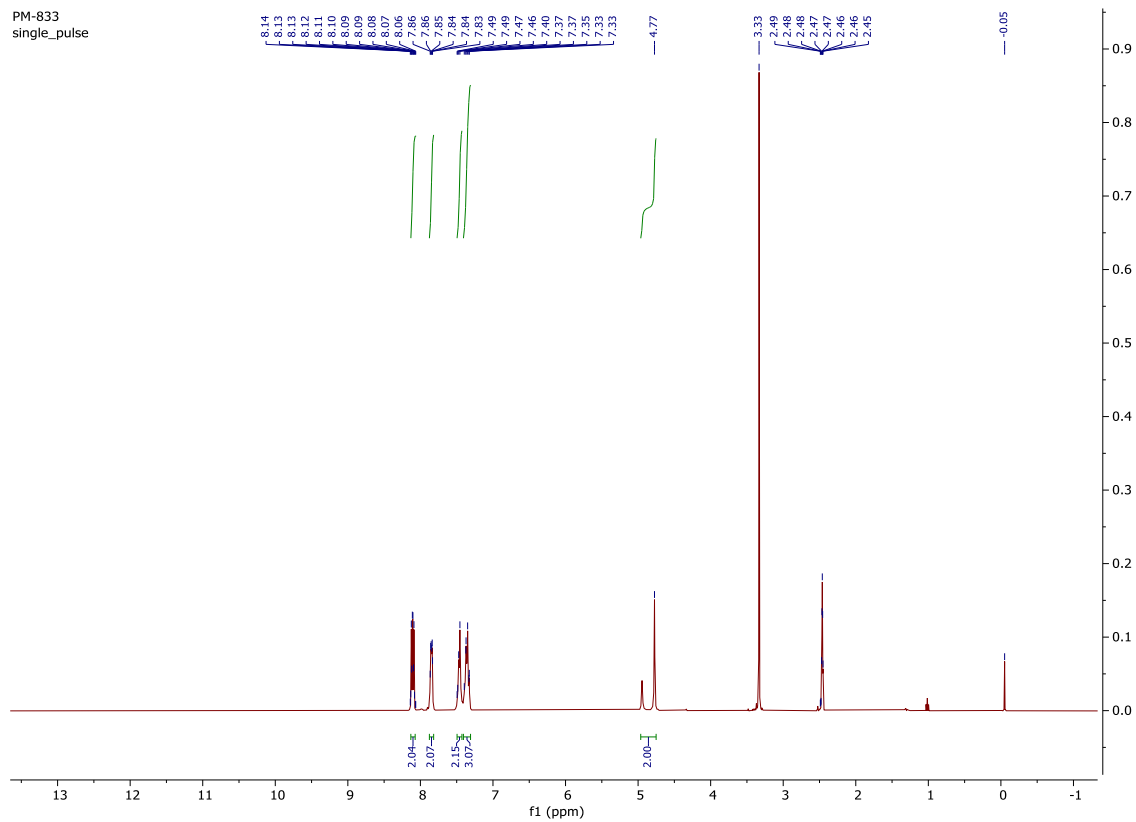

## <sup>13</sup>C of 14e

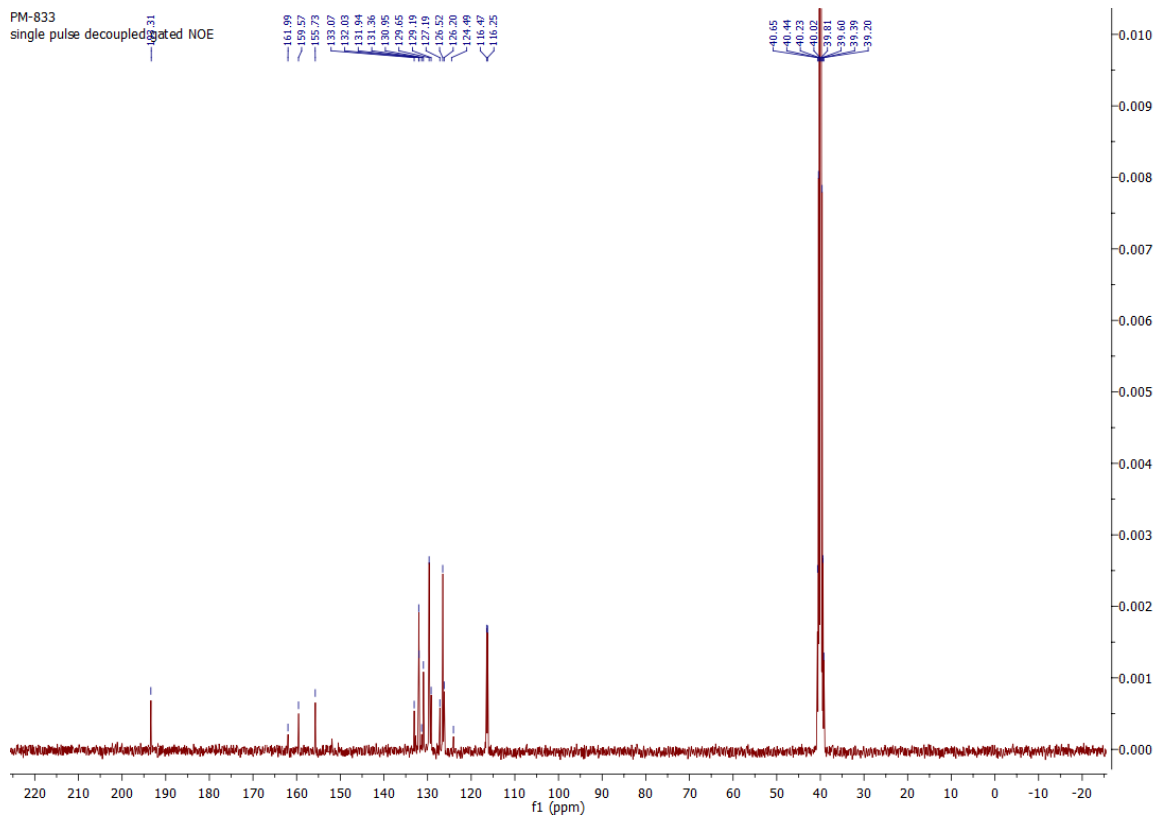

# 1-Trifluoroacetyl-3-phenyl-5-((2-oxo-2-(4-chlorophenyl)ethyl)thio)-1,2,4-triazole 14f

## <sup>1</sup>H of 14f

MH-834  
single\_pulse

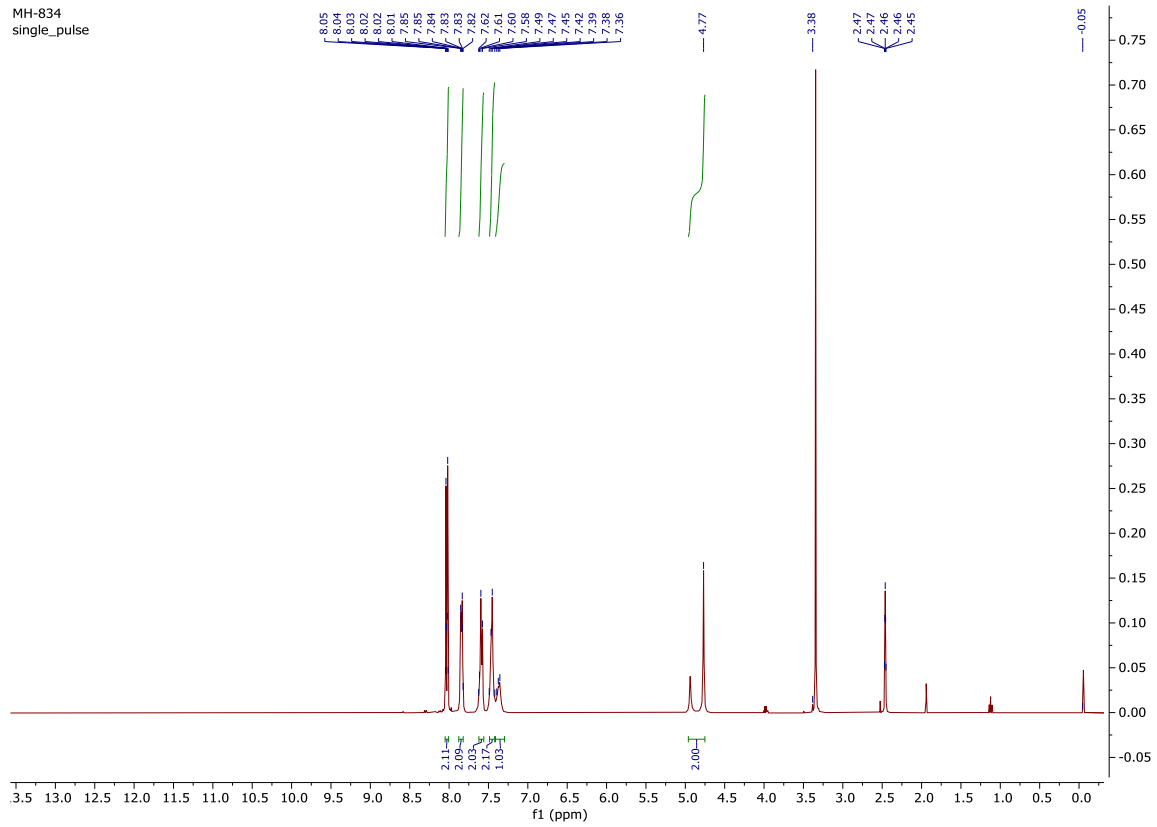

## <sup>13</sup>C of 14f

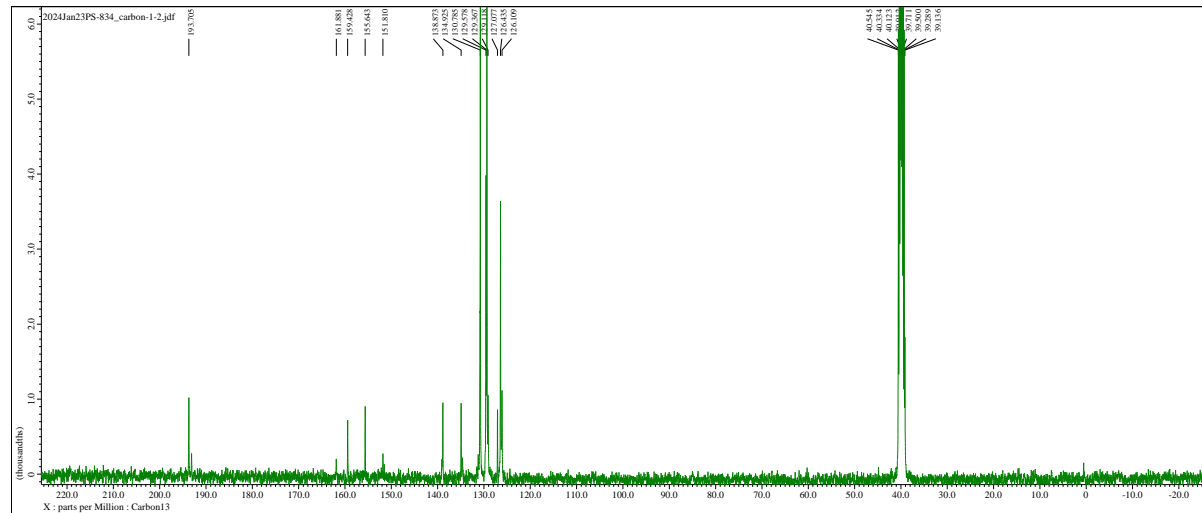







# 1-Trifluoroacetyl-3-(4-methoxyphenyl)-5-((2-oxo-2-(4-methoxyphenyl)ethyl)thio)-1,2,4-triazole 14k

## <sup>1</sup>H of 14k

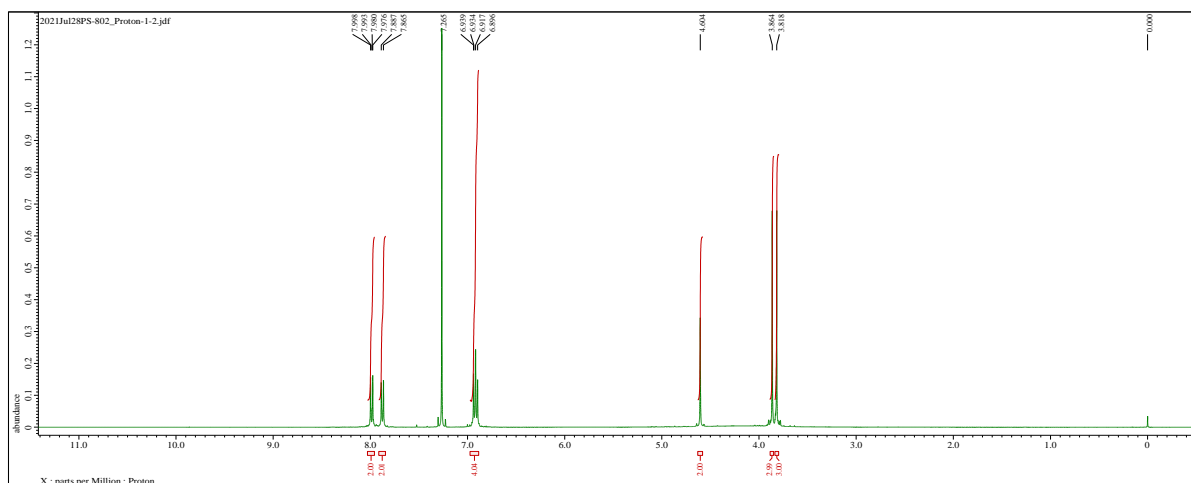

## <sup>13</sup>C of 14k

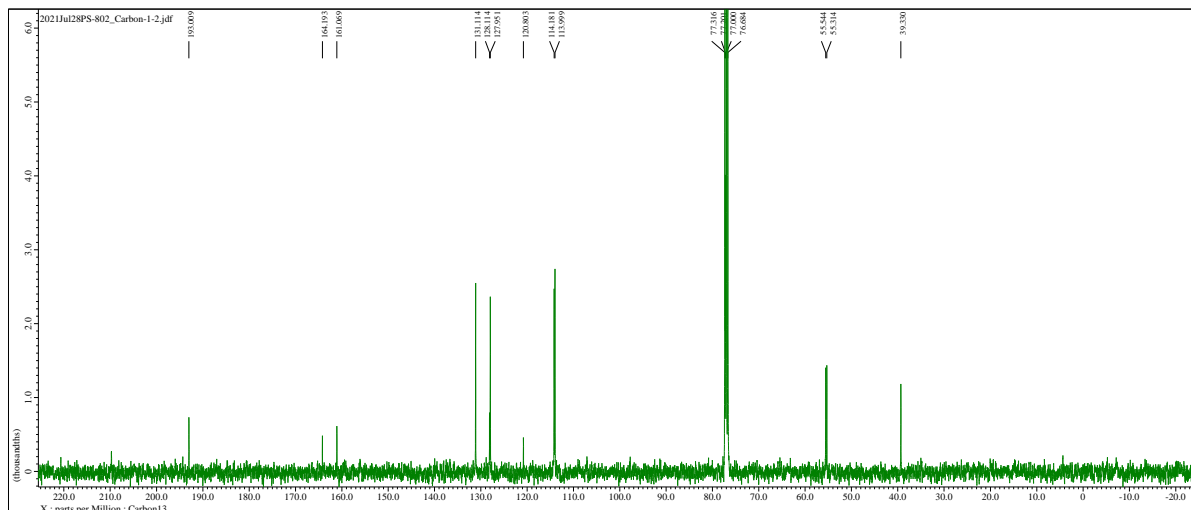

# 1-Trifluoroacetyl-3-(4-methoxyphenyl)-5-((2-oxo-2-thienylethyl)thio)-1,2,4-triazole 14l

## <sup>1</sup>H of 14l

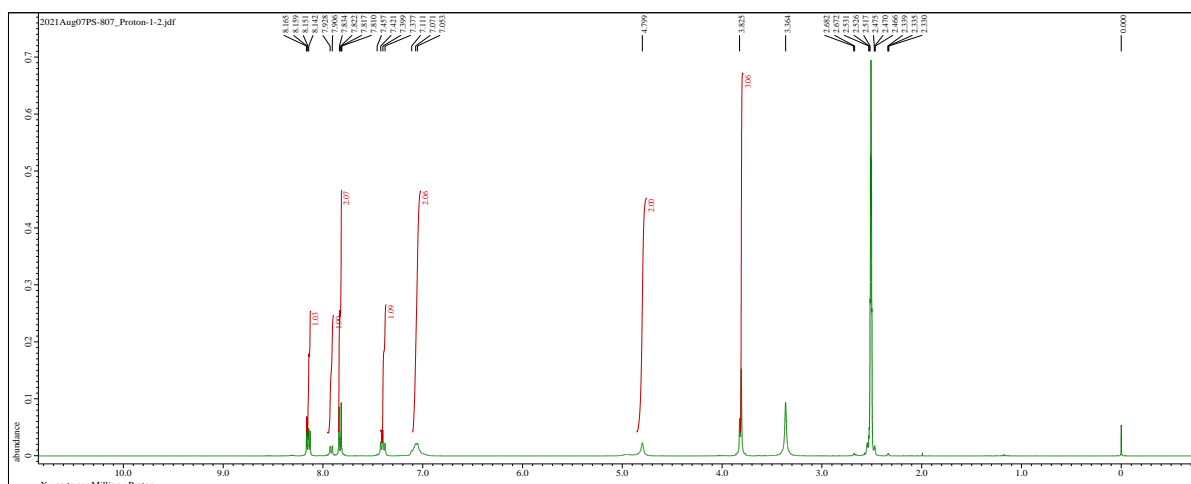

# <sup>13</sup>C of 14l

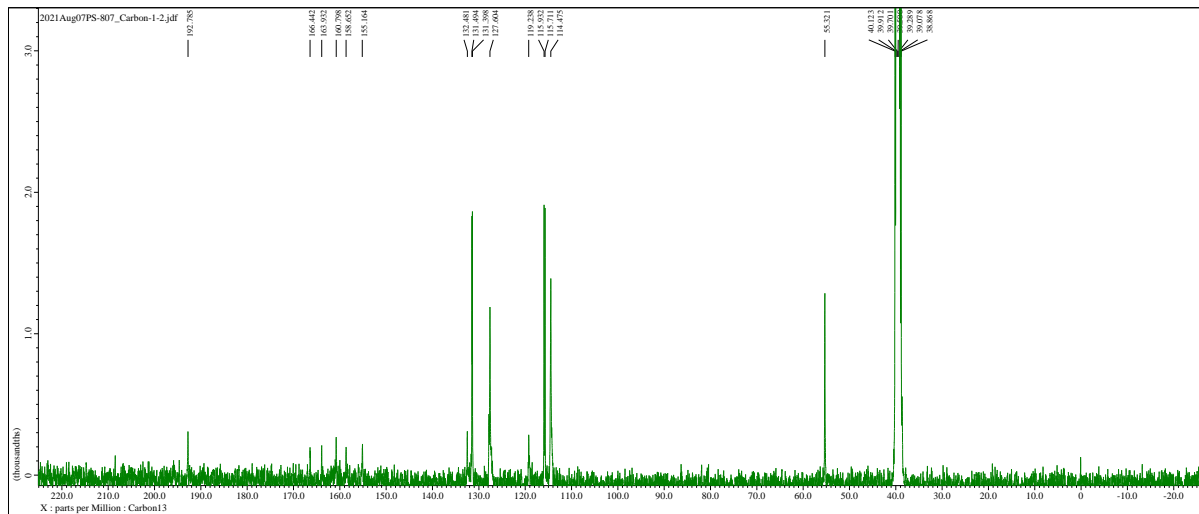

# 1-Trifluoroacetyl-3-(4-methoxyphenyl)-5-((2-oxo-2-(4-tolyl)ethyl)thio)-1,2,4-triazole

## 14m

### <sup>1</sup>H of 14m

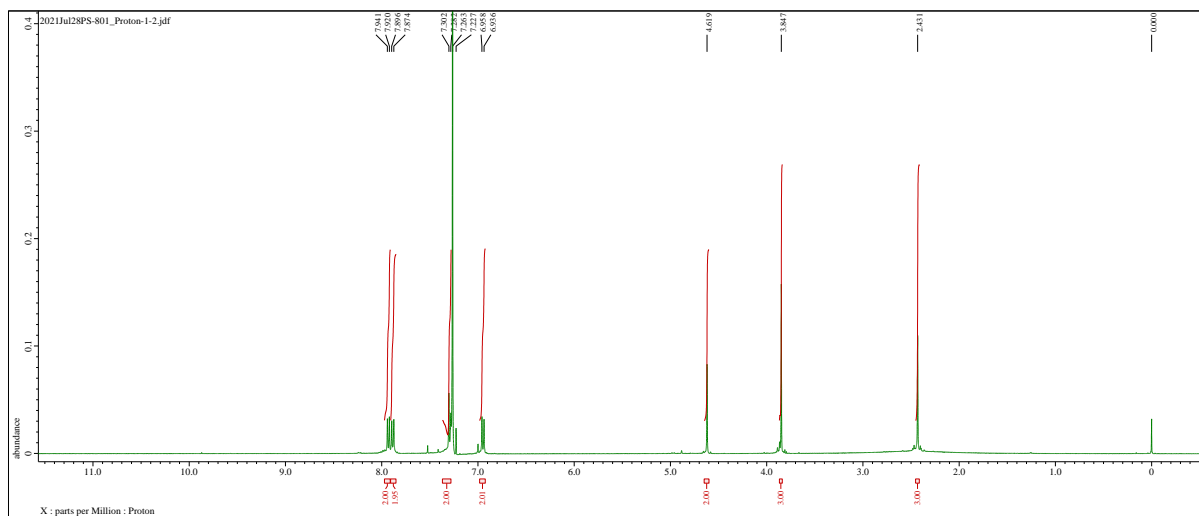

### <sup>13</sup>C of 14m

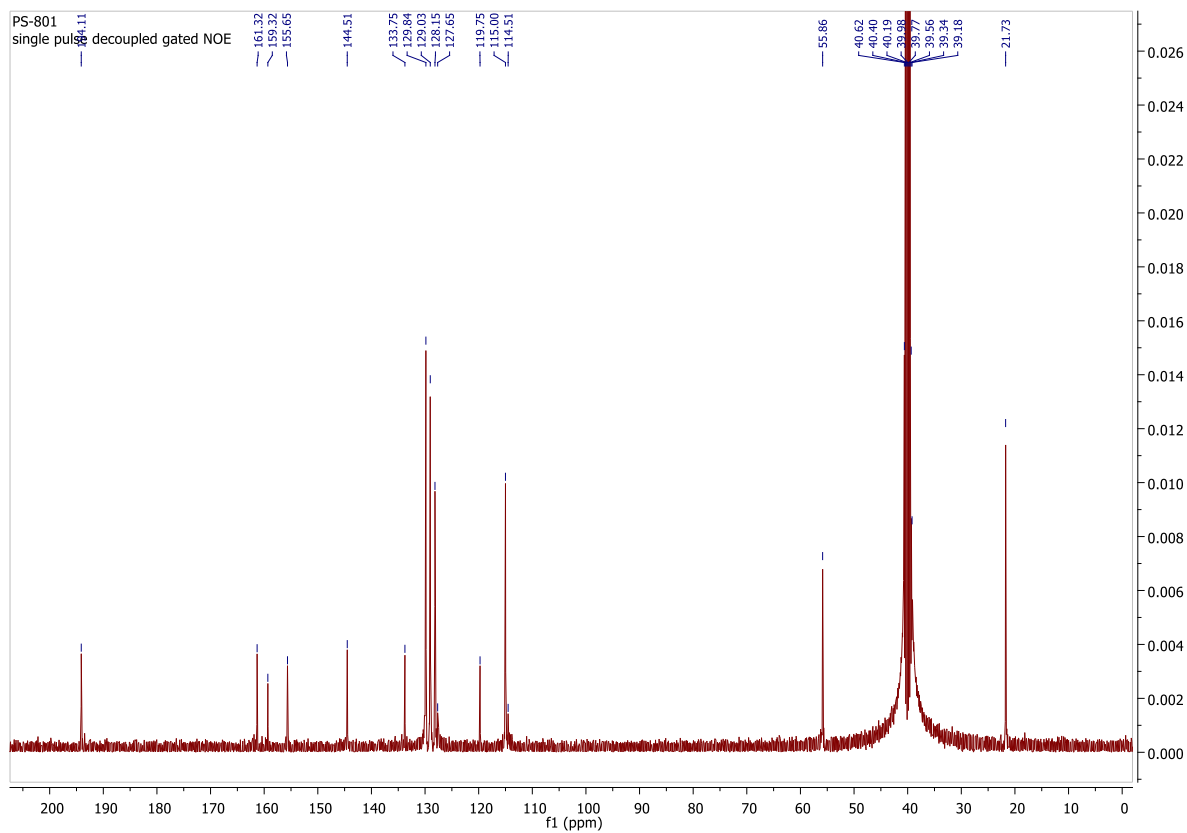

### 1-Trifluoroacetyl-3-(4-chlorophenyl)-5-((2-oxo-2-(4-bromophenyl)ethyl)thio)-1,2,4-triazole 14n

### <sup>1</sup>H of 14n

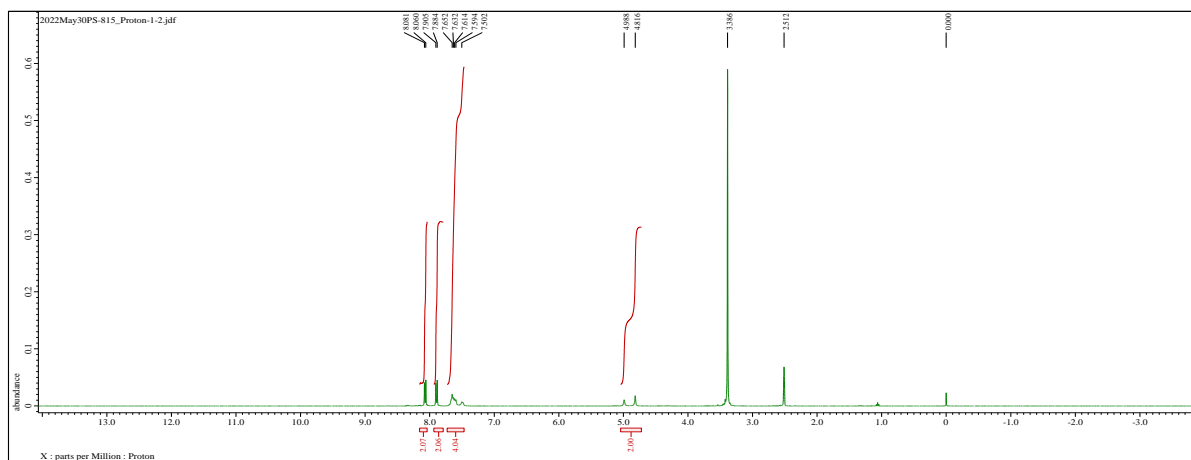



### <sup>13</sup>C of 14n

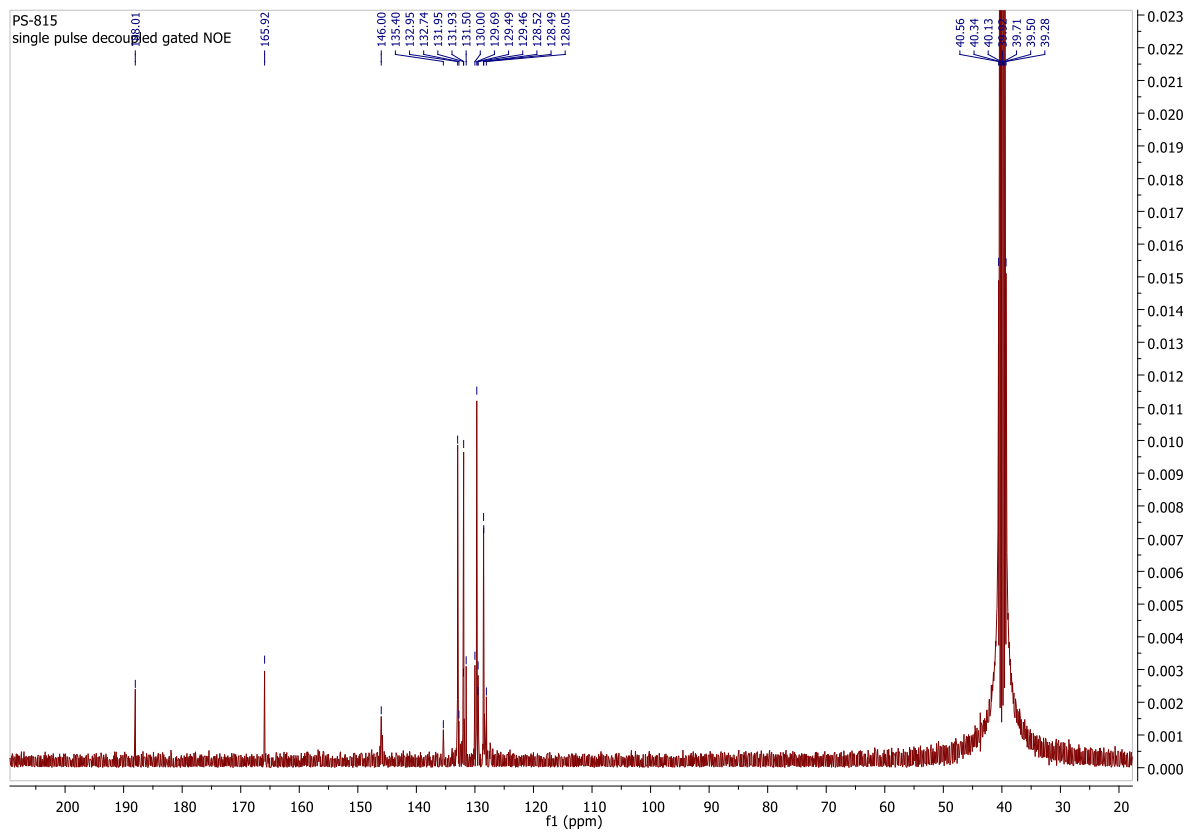

### 1-Trifluoroacetyl-3-(4-chlorophenyl)-5-((2-oxo-2-thienylethyl)thio)-1,2,4-triazole 14o

### <sup>1</sup>H of 14o

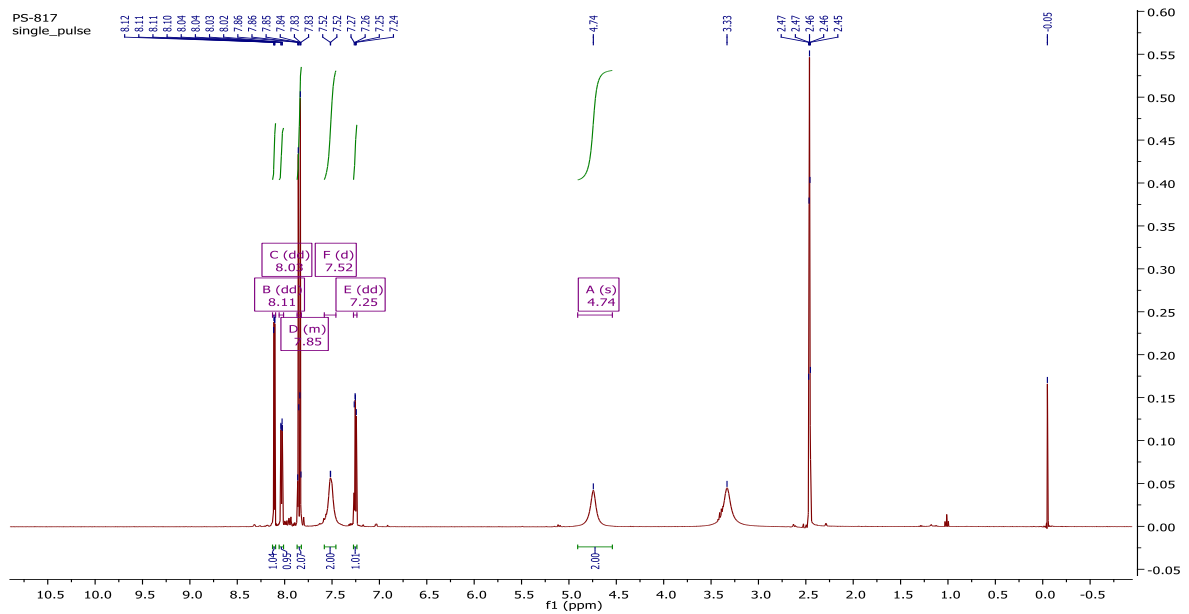

# $^{13}\text{C}$ of 14o

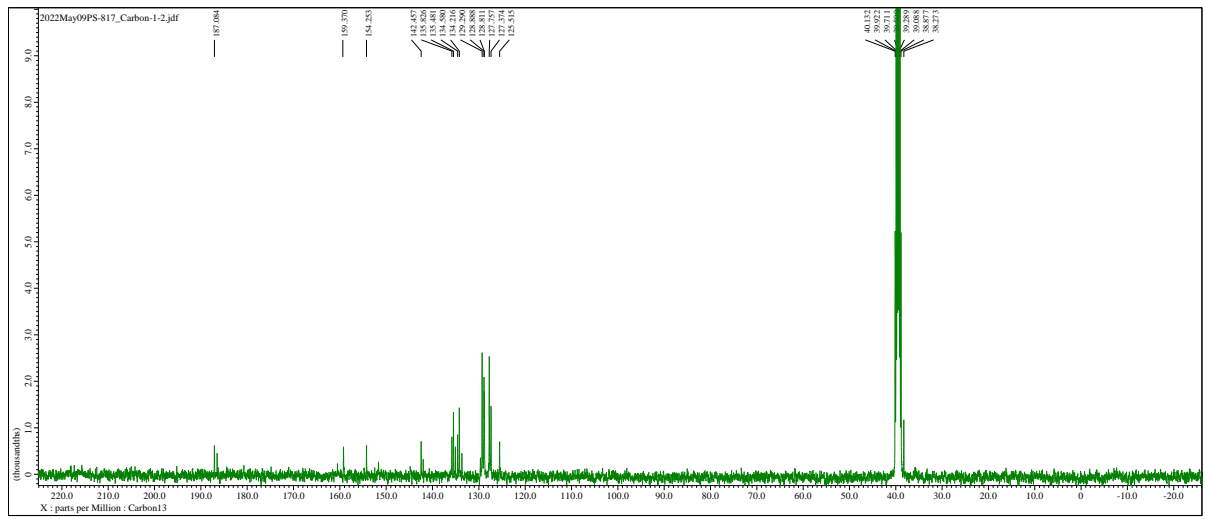

Supplement: d4ra00083h1.pdf [file d4ra00083h1.pdf]
